# 1 **Sex-biased gene expression is repeatedly masculinized in** 2 **asexual females**

3  
4 Darren J. Parker<sup>1,2,\*</sup>, Jens Bast<sup>1</sup>, Kirsten Jalvingh<sup>1</sup>, Zoé Dumas<sup>1</sup>, Marc Robinson-Rechavi<sup>1,2</sup>, and  
5 Tanja Schwander<sup>1</sup>

6  
7 1. Department of Ecology and Evolution, University of Lausanne, Lausanne, Switzerland,

8 2. Swiss Institute of Bioinformatics, Lausanne, Switzerland

9 \* Corresponding author: [DarrenJames.Parker@unil.ch](mailto:DarrenJames.Parker@unil.ch)

10

## 11 **Abstract**

12

13 Males and females feature strikingly different phenotypes, despite sharing most of their genome.  
14 A resolution of this apparent paradox is through differential gene expression, whereby genes are  
15 expressed at different levels in each sex. This resolution, however, is likely to be incomplete,  
16 leading to conflict between males and females over the optimal expression of genes. We test the  
17 hypothesis that gene expression in females is constrained from evolving to its optimum level due  
18 to sexually antagonistic selection on males, by examining changes in sex-biased gene expression  
19 in five obligate asexual species of stick insect, which do not produce males. We predicted that  
20 the transcriptome of asexual females would be feminized as asexual females do not experience  
21 any sexual conflict. Contrary to our prediction we find that asexual females feature masculinized  
22 gene expression, and hypothesise that this is due to shifts in female optimal gene expression  
23 levels following the suppression of sex.

## 24 Introduction

25

26 Genetic constraints between developmental stages, sexes, and castes arise as a result of a  
27 shared genome<sup>1</sup>. Species are able to mitigate these constraints by differentially expressing suites  
28 of genes in specific contexts to produce and maintain different phenotypes. This resolution,  
29 however, may be incomplete when regulatory control of gene expression is not sufficiently labile  
30 as to allow for optimal expression in each phenotypic context, leading to intralocus conflict<sup>2</sup>.

31

32 This phenomenon has been most widely studied between the sexes, where strong sexual  
33 dimorphism is generally underlain by sex-biased gene expression<sup>3</sup>. Sex-biased gene expression  
34 is thought to have been largely driven by selection to resolve intralocus sexual conflict<sup>4</sup>. As such,  
35 contemporary sex-biased gene expression is expected to represent a combination of both  
36 resolved and partially un-resolved sexual conflict<sup>5,6</sup>. In the latter case, suboptimal gene expression  
37 levels are maintained by opposing selection in males and females, with the relative strengths of  
38 selection acting on each sex determining the difference between optimal and observed  
39 (suboptimal) expression levels.

40

41 Sexually antagonistic selection has the potential to constrain the optimal expression of large  
42 portions of a species' transcriptome and to thereby generate sub-optimal phenotypes in each sex.  
43 However, whether un-resolved conflict is pervasive can be difficult to investigate in natural  
44 populations, due to the relatively small (but numerous) effects of individual loci<sup>5,7</sup>. An ideal  
45 situation to address this question would be to examine how the transcriptome evolves following  
46 the cessation of sexual conflict. This is the case in asexually reproducing species when derived  
47 from a sexual ancestor. Because asexual species consist only of females, there is no sexual  
48 conflict and selection can optimize the female phenotype independently of any correlated effects  
49 in males. Despite the potential of this approach, previous studies have only used sexual species,  
50 examining how the transcriptome changes under experimentally altered levels of sexual  
51 selection<sup>8-11</sup>.

52

53 The premise of these studies is that because sexual selection is typically stronger on males than  
54 females<sup>12</sup>, a reduction in sexual selection (e.g. by enforcing monogamy) will disproportionately  
55 affect males, resulting in a shift in gene expression towards the female optimum. While this  
56 optimum is unknown, it is assumed that female-biased genes are generally beneficial for females,  
57 and male-biased genes for males<sup>4,13</sup>, such that shifts towards female optima would generate a

58 feminization of gene expression (increased female-biased and decreased male-biased  
59 expression). The empirical support for this hypothesis, however, remains mixed<sup>8-11</sup>, and the most  
60 recent study<sup>9</sup> further showed that shifts in sex-biased gene expression under altered sexual  
61 selection varied among tissues and conditions. However, a potential constraint in these studies  
62 is that even under reduced sexual selection, selection still acts on male phenotypes as fertile  
63 males still need to be produced in each generation. Thus, many genes potentially subject to  
64 sexually antagonistic selection therefore remain unaffected by reduced sexual selection, with  
65 genes negatively affecting male viability or fertility being obvious examples. This constraint does  
66 not apply to recently derived asexual species as *all* aspects of sexual conflict present in the sexual  
67 species are absent in the asexual species.

68

69 Here we use *Timema* stick insects to examine how sex-biased genes change in expression  
70 following a transition to asexuality. *Timema* comprise multiple independent transitions to  
71 asexuality (Fig. 1)<sup>14</sup>, allowing us to examine how idiosyncratic any shifts in sex-biased gene  
72 expression are. Furthermore, male *Timema* have a single X and no Y chromosome (XX / X0 sex  
73 determination)<sup>15</sup>, avoiding any potential difficulties arising from sex-limited regions of the genome.  
74 We first identify genes with sex-biased expression in five sexual *Timema* species by sequencing  
75 the transcriptomes of three different tissue types in each sex. We then study the fate of these sex-  
76 biased genes in close asexual relatives of each sexual species to test whether their expression  
77 is consistently feminized. This allows us to test for the first time the importance of intralocus sexual  
78 conflict on gene expression changes following a loss of sex.

## 79 Results

80

### 81 ***Gene expression is repeatedly masculinized in asexual females***

82

83 To examine changes in sex-biased gene expression in asexual females, we first identified  
84 orthologous genes in each of the five sexual-aseual sister species pairs using reciprocal best  
85 Blast hits. We then classified genes as being sex-biased by comparing male and female  
86 expression in each sexual species (FDR < 0.05, absolute fold-change > 2). Sex-biased genes  
87 were identified separately for each sexual species and each of the three tissue types (whole  
88 bodies, reproductive tract and leg tissue; see Methods). As expected, given their different roles  
89 and morphology in males and females, reproductive tracts featured large numbers of sex-biased  
90 genes in all species (2843-3845, corresponding to approximately 30% of each transcriptome;  
91 Supplemental Table 1). Legs and whole bodies had fewer genes with sex-biased gene expression  
92 overall, but with considerable variation among species (0.5-12%; Supplemental Table 1).  
93 Variation among species could be due to variation in sexually dimorphic physiology between  
94 species but is also likely driven (at least partially) by differences in between sample variance  
95 (Supplemental Table 2). Note that because sex-biased genes were identified separately for each  
96 sexual species this approach cannot be used to determine if sex-biased genes are the same  
97 across species. We therefore investigated if sex-biased genes are the same between species as  
98 a second step (see below). Although the genes may be different, we can examine if sex-biased  
99 genes in different species are involved in similar functions by comparing the GO terms of sex-  
100 biased genes across species. Sex-biased genes in each species and tissue type were  
101 significantly enriched for many functions (136-445 significant GO terms for male-biased genes,  
102 138-726 for female-biased genes; Supplemental Table 3). Few GO terms overlapped between  
103 species (Supplemental Fig. 1) (though the overlap was greater than expected by chance (FDR <  
104 0.05, Supplemental Table 4)), even when enriched GO terms were first clustered by parent or  
105 child terms (see Supplemental Material and Supplemental Fig. 2).

106

107 We then examined whether sex-biased genes change in expression between sexual and asexual  
108 females. Surprisingly, we found that the transcriptomes of asexual females were strongly  
109 masculinized. The expression of female-biased genes was significantly reduced in all five  
110 independently evolved asexual species and in each tissue type (14 out of 15 instances, the  
111 exception being the whole-body comparison between *T. podura* and *T. genevieveae*, which shows  
112 reduced female-biased gene expression, but not significantly (FDR = 0.076), Fig. 2, Supplemental

113 Table 5). By contrast, male-biased genes significantly increased in expression in most tissue  
114 types of asexual females (10 out of 15 instances), although they also significantly decreased in  
115 two instances (in *T. shepardi* reproductive tracts and *T. tahoe* legs) (Fig. 2, Supplemental Table  
116 5). We also examined if the amount of change in sex-biased gene expression altered with asexual  
117 lineage age (measured as sex-asex species divergence time, see Supplemental material and Fig.  
118 1). While we found a relationship between sex-biased gene expression and asexual lineage age  
119 (permutation ANCOVA,  $P < 0.001$ ), it was small and inconsistent between tissue-types  
120 (Supplemental Fig. 3, p-value of interaction term  $< 0.001$ ).

121  
122 In addition to sex-biased genes, one class of interesting genes is sex-limited genes (genes  
123 expressed in only one of the two sexes). The expression of sex-limited genes depends on sex-  
124 specific regulation in males and females. Sex-limited genes are therefore expected to be free  
125 from sexual conflict over expression levels and may show different shifts in expression in asexual  
126 females than sex-biased genes. In particular, we expect that there will be no overall change in  
127 expression between sexual and asexual females, if relaxation of sexual conflict is the main driver  
128 of changes in asexual females. Note that sex-limited genes were identified separately from sex-  
129 biased genes to avoid inflating the dispersion of the model used to identify sex-biased genes (see  
130 Methods). Overall, we find only a few sex-limited genes (0-50), with most of these in the  
131 reproductive tracts (Supplemental Tables 6 and 7). Like female-biased genes, female-limited  
132 genes also show a significant reduction in expression in asexual females in most cases (8 out of  
133 the 9 instances with more than one female-limited gene) (Fig. 3, Supplemental Fig. 4,  
134 Supplemental Table 6). Almost all male-limited genes show very little to no expression in asexual  
135 females, and are expressed at much lower levels than found in males (Fig. 3, Supplemental Fig.  
136 4, Supplemental Table 6), suggesting that few, if any, male-limited genes have been co-opted for  
137 new functions in asexual females.

138  
139 Our analyses show that gene expression in asexual females is generally masculinized. This effect  
140 is particularly clear for female-biased genes which decrease in expression across five different  
141 species and three different tissue types, showing the masculinization of sex-biased gene  
142 expression in asexuals is very repeatable. Given this unexpected finding, we verified that our  
143 results were not biased by the gene sets we chose to use, which excluded genes with very low  
144 expression in asexual females, and genes without an ortholog between sexual and asexual sister  
145 species (see Methods). Exclusion of these genes could bias our results if shifts in gene expression  
146 disproportionately occur in these genes. To examine the impact of these factors we firstly

147 repeated our analyses without excluding genes with low expression in asexual females. Generally  
148 excluded genes were few in number (1-6%) and more likely to be male-biased (Supplemental  
149 Tables 8-9). Repeating our analyses with these genes included found that shifts in sex-biased  
150 gene expression in asexuals remained qualitatively the same as when they were excluded  
151 (Supplemental Fig. 5). Secondly, we mapped reads from all samples of a sexual-aseexual species  
152 pair to a single reference (the full transcriptome of either the sexual or the asexual species). With  
153 this strategy there is no need to identify orthologs between sexual and asexual species pairs.  
154 Repeating our analyses using the full sexual or asexual transcriptome, we found very few sex-  
155 biased genes had no expression in asexual females (Supplemental Tables 10-13), and we  
156 obtained qualitatively similar results as in the main analysis (Supplemental Figs 6 and 7). Taken  
157 together these analyses show that the masculinization of gene expression we observe is not  
158 biased by our gene set selection.

159

#### 160 ***Masculinization of sex-biased gene expression does not depend on gene identity***

161

162 In the above analyses, each species-pair was treated separately, which allowed us to maximize  
163 the number of genes used in comparing changes in sex-biased gene expression between sexual  
164 and asexual females. In doing so we use five different reference gene sets (pairwise orthologs  
165 between sexual and asexual sister species, see Methods), which prevents us from examining  
166 whether repeated changes to the same sex-biased genes are responsible for the expression shifts  
167 we observe in asexual females.

168

169 To answer this question we firstly repeated the above analyses using only genes with 1-to-1  
170 orthology between all ten species (between 2886 and 3003 expressed genes depending on tissue  
171 type, see Methods). Results based on this reduced gene set are qualitatively the same as using  
172 the full gene set, i.e. an overall masculinization of sex-biased gene expression in asexual females  
173 (Supplemental Fig. 8). As in the previous analyses the reproductive tract featured more sex-  
174 biased genes (784-1071) than whole bodies and legs (43-375) (Supplemental Table 14). This  
175 pattern is further illustrated by the fact that reproductive tract samples cluster first by sex and then  
176 phylogeny, whereas it is the opposite for legs (Fig. 4). Whole-body samples show a more mixed  
177 pattern with most samples clustering firstly by sex but with one species (*T. podura*, which has the  
178 fewest sex-biased genes in this tissue type) clustering firstly by phylogeny. Despite the lower  
179 power of this smaller gene set (compared to the full gene set), expression of female-biased genes  
180 was significantly reduced in asexual females in 11 out of 15 instances. Male-biased gene

181 expression significantly increased in asexual females in 9 out of 15 instances (Supplemental Fig.  
182 8, Supplemental Table 15).

183

184 The overlap between sex-biased genes from different species is significantly greater than  
185 expected by chance but rather small in size (Figs. 5A and 5B, Supplemental Table 16). Importantly  
186 for our analyses, the small overlap between species means that the consistently masculinized  
187 gene expression we observe in asexual females is largely independent of gene identity. This  
188 finding is strengthened by an examination of the shifts in expression for genes sex-biased in 1, 2,  
189 3, 4 or 5 sexual species, which show that the masculinization seen in asexual females is stronger  
190 for genes that are sex-biased in fewer sexual species (Fig. 5C, FDR < 0.05 for male and female-  
191 biased genes in all tissues, Supplemental Table 17). These findings suggest that the shifts in sex-  
192 biased gene expression we see are likely due to the property of them being sex-biased, rather  
193 than them being involved in the same specific biological process.

194

#### 195 ***Functional analysis of sex-biased genes which change in expression in asexual females***

196

197 A plausible explanation for decreased expression of female-biased genes in asexual females is  
198 selection against traits used for sexual reproduction. In asexual *Timema*, several sexual traits are  
199 known to be reduced, including the production of volatile and contact pheromones<sup>16</sup>. Here we  
200 observe that female-biased genes are indeed enriched for terms linked to the production of sexual  
201 phenotypes (e.g. pheromone biosynthetic process, reproductive behavior, etc, Supplemental  
202 Table 3), however, to more specifically identify functions that may be affected by shifts in gene  
203 expression, we examined the GO terms specifically enriched in female-biased genes with  
204 decreased expression in asexual females.

205

206 Depending on species and tissue type, between 0 and 160 GO terms were significantly enriched,  
207 with far fewer terms enriched in legs than in whole-bodies or reproductive tracts (Supplemental  
208 Table 18), as expected given the smaller number of sex-biased genes in legs. There are no  
209 consistently enriched GO terms between all species (Supplemental Fig. 9A), and although some  
210 terms can be easily associated with reduction of sexual traits (e.g. olfactory behavior,  
211 chemosensory behavior, detection of stimulus involved in sensory perception), the majority of  
212 terms have no clear link to sexual trait reduction. Most enriched terms instead are related to  
213 metabolic and developmental processes. This could potentially be a signature of a shift in energy  
214 budget in asexual females which no longer have to produce costly sexual traits (Supplemental

215 Table 18). Male-biased genes that increased in expression were enriched for between 0 and 81  
216 terms, and again, no terms were shared between all species, and very few between any pair of  
217 species (Supplemental Table 19, Supplemental Fig. 9B).

218

219 The removal of sexual conflict is expected to cause the feminization of gene expression in asexual  
220 females. Although overall the pattern of expression change we observe is opposite to this  
221 prediction, it is possible that a feminization of gene expression still occurs for a small subset of  
222 genes, but its effect is masked by the larger effect of masculinization. We specifically examine  
223 the subset of sex-biased genes that follow the expected pattern of feminization, by looking at  
224 processes enriched for female-biased genes that increase in expression and male-biased genes  
225 that decrease in expression in asexual females. We would expect that genes showing  
226 feminization would be enriched for processes associated with sexual conflict. Both male- and  
227 female-biased genes showed an enrichment of many terms (between 0 and 360, and between 1  
228 and 195, respectively), including some that could be associated with sexual conflict (e.g. sexual  
229 reproduction, female mating behavior, etc). However, the majority of terms have no clear link to  
230 sexual conflict, and again no terms were shared between all species (Supplemental Table 20,  
231 Supplemental Table 21, Supplemental Fig. 10).

232

233 Taken together, the functional enrichment analyses suggest that the changes in gene expression  
234 we observe are involved in a diverse set of processes in each of the species. This is in line with  
235 what we observe from the gene expression analyses, which show that sex-biased genes have  
236 little overlap between species, and that the largest shifts in gene expression are in genes that are  
237 sex-biased in the fewest species. In addition to being different between species, the enriched GO  
238 terms were not particularly informative for determining if they are involved in sexual trait decay or  
239 sexual antagonism. This reflects the relative difficulty in obtaining functional annotations in  
240 *Timema*, due to their evolutionary distance from a well characterised insect model system,  
241 meaning that most functions are broad and difficult to attribute to specific roles in sexual traits or  
242 sexual antagonism.

243

#### 244 ***No disproportionate sequence divergence of sex-biased genes in asexuals***

245

246 Sex-biased genes in sexual species often evolve rapidly, due to strong sexual selection and/or  
247 sexual antagonism which drives positive selection for amino-acid changes<sup>17</sup> or because of relaxed  
248 evolutionary constraint<sup>3</sup>. In asexual species, sex-biased genes are also expected to evolve



249 rapidly, but due to reduced purifying selection on redundant sexual traits underlain by sex-biased  
250 genes. Although interesting, identifying differences in evolutionary rates between gene classes in  
251 asexual species is difficult due to the overall elevated rates in asexual species (including in  
252 *Timema*<sup>18</sup>), and because genes are inherited as a single linkage group which reduces the power  
253 to detect differences in evolutionary rate between genes. Here we found evidence for an elevated  
254 rate of dN/dS in asexual species and in sex-biased genes (Supplemental Fig. 9, Supplemental  
255 Tables 22-24). We do not see any evidence for an interaction between sex-bias and reproductive  
256 mode (Supplemental Fig. 11, Supplemental Tables 22-24), indicating that the increase in dN/dS  
257 for sex-biased genes is similar in sexual and asexual species.

## 258 Discussion

259

260 Conflict over gene expression levels between males and females is thought to drive the evolution  
261 of sex-biased gene expression<sup>4</sup>. While sex-biased expression is expected to reduce the amount  
262 of intralocus sexual conflict, it is unlikely to be complete for many genes, meaning that some  
263 proportion of sex-biased genes are likely subject to sexually antagonistic selection<sup>5,6</sup>. Here we  
264 chose to investigate how sex-biased gene expression changes in asexual species which  
265 experience no sexual conflict. We predicted that transcriptomes of asexual females would be  
266 feminized as sex-biased genes in asexual females would no longer be constrained by  
267 countervailing selection pressures in males. Contrary to our prediction we found evidence for an  
268 overall masculinization of sex-biased gene expression in asexual females. This pattern of  
269 masculinization was very consistent across each of the five independently derived asexual  
270 species, and three tissue types we examined. In addition, masculinization was not driven by  
271 changes in expression of the same genes in each species, showing that it is the property of being  
272 sex-biased *per se* that is most likely to be responsible for the shifts in expression we observe.

273

274 Taken together, our results provide strong evidence for a masculinization of gene expression in  
275 asexual species. The strength of this finding does not mean there is no sexual conflict over optimal  
276 levels in sexual species, but rather that changes in asexual females driven by a release of conflict  
277 are negligible relative to changes driven by other mechanisms. The presence of such alternative  
278 mechanisms can best be illustrated by the fact that female-limited genes (that should experience  
279 no sexual conflict over gene expression level in sexual species), show a consistent  
280 masculinization similar to sex-biased genes. We suggest that this is because although  
281 reproducing asexually does remove the pressure of sexual conflict, it also removes the need for  
282 many of the sexual traits sexually dimorphic gene expression underlies. Consequently, while we  
283 expected gene expression in asexual females to be free to move to a female optimum, it is also  
284 likely that the optimal female phenotype is different for sexual and asexual females.

285

286 Female asexual *Timema* show reductions in several sexual traits including a reduced sperm  
287 storage organ, and reduced volatile and contact pheromone production<sup>16</sup>. Since sexually  
288 dimorphic traits are largely a product of sex-biased gene expression<sup>3</sup>, a link between reduced  
289 female sexual traits and reduced female-biased gene expression is a plausible explanation for  
290 the decreased expression of female-biased genes we observe. It is less clear why we also see  
291 an accompanying increase of expression in male-biased genes in asexual females. We suggest

292 four, non-mutually exclusive, speculative explanations for this. Firstly, increased expression of  
293 male-biased genes may arise as a result of sexual trait reduction in cases where high expression  
294 of a gene in males acts to suppress the development of a trait, or when low expression in females  
295 acts to enhance a female sexual trait. In such genes selection for sexual trait reduction in asexual  
296 females would be expected to produce an increase in expression. A second potential explanation  
297 is that in sexual species there are a number of products produced by males and then transferred  
298 to females that are important for female fertility. For instance, in many insects, ovulation and  
299 oviposition are stimulated by substances in the male ejaculate such as juvenile hormone,  
300 prostaglandins, and myotropins<sup>19,20</sup>. Since these products are not provided by males in asexual  
301 species, females may need to increase expression of the genes that produce these products to  
302 compensate. While this explanation could explain some of the increased expression of male-  
303 biased genes we observe in the reproductive tract, it is unlikely to be a general explanation for  
304 the increased expression of male-biased genes across all species and tissue types. A third  
305 potential explanation is that if males and females in sexual species have separate niches, a  
306 transition to asexuality would allow asexual females to expand into the male niche. Differential  
307 niche use is likely to, at least in part, be mediated by sex-biased gene expression, meaning that  
308 asexual females would need to masculinize their gene expression in order to occupy the vacant  
309 niche left by males. While differences in male and female niche use have not been extensively  
310 studied in *Timema*, sexual dimorphism in mandible shape has been reported, implying that there  
311 may be some differential use of niche-space in sexual *Timema* species<sup>21</sup>. Future work examining  
312 sexual niche usage and gene expression is needed to evaluate this hypothesis. Finally, another  
313 potential explanation for masculinization of gene expression in asexual *Timema* is the decay of  
314 dosage compensation. *Timema* have an XX/X0 sex-determination system<sup>15</sup>, meaning that in  
315 sexual species the X chromosome is present as a single copy in males and as two copies in  
316 females. *Timema* are likely to have evolved dosage compensation to equalise expression of X-  
317 linked genes between the sexes. In asexual species selection for dosage compensation is absent,  
318 which could lead to expression changes of X-linked genes. Changes in X-linked genes alone are  
319 however unlikely to explain the masculinized gene expression of asexual females as different  
320 species are characterized by quite different sets of sex-biased genes (Fig. 5) yet there is no  
321 evidence of X-chromosome turnover in *Timema* (<sup>15</sup>; unpublished results).

322  
323 For the reasons detailed above, we believe that female trait reduction is the most likely  
324 explanation for the majority of changes in sex-biased gene expression we observe, rather than  
325 the cessation of sexual conflict. Similar to our findings, a recent study<sup>9</sup> found that experimentally

326 reduced sexual selection also produced an overall masculinization of gene expression in *D.*  
327 *pseudoobscura*. However, Veltsos et al.<sup>9</sup> interpret their findings as a consequence of reduced  
328 conflict, and attribute masculinization to the dynamic nature of sexually antagonistic selection  
329 causing unpredictable changes in sex-biased gene expression. An alternative explanation,  
330 however, is that the masculinization of gene expression in females seen in Veltsos et al.  
331 corresponds to a reduction of sexual traits under reduced sexual selection, similar to our findings  
332 in *Timema*. Previous studies have reported reduced sexual traits in females evolving under  
333 reduced sexual selection in the *D. pseudoobscura* lines studied by Veltsos et al.<sup>11,22</sup>. As such,  
334 both Veltsos et al. and our results highlight that the shifts in sex-biased gene expression we  
335 observe in the absence, or under reduced levels, of sexual conflict may be in part due to a shift  
336 in the optimal trait levels in females. Such shifts in female optima under different sexual selection  
337 scenarios are important to consider as an explanation even for studies that observe the expected  
338 feminization of sex-biased gene expression<sup>8,10,11</sup>. This is because reducing sexual selection can  
339 also favour the increased expression of female sexual traits under some conditions. In these  
340 situations, the feminization of sex-biased gene expression can be due to changes in sexual trait  
341 optima rather than due to a reduction in the amount of intralocus sexual conflict. More generally,  
342 optimal values for traits should be affected by the nature and level of sexual conflict present in a  
343 population. Changes to optimal trait values under different selective scenarios are however  
344 difficult to predict *a priori*<sup>23</sup>, meaning future studies will require careful examination of optimal  
345 phenotypes under different selective scenarios in order to correctly interpret any changes in sex-  
346 biased gene expression.

347  
348 In conclusion, we find that sex-biased gene expression is repeatedly masculinized following a  
349 transition to asexuality, and suggest that this result is driven primarily by a reduction of female  
350 sexual traits. While we observe similar patterns of masculinization across all five asexual species,  
351 the genes involved were mostly different, reflecting the dynamic nature of sex-biased gene  
352 expression. In line with this, the functional processes associated with expression change in each  
353 species were also diverse. Finally, our study highlights the importance of considering explanations  
354 other than intralocus sexual conflict for explaining shifts in sex-biased gene expression, since  
355 differences in sexual conflict are also likely to be accompanied by changes in sexual trait optima  
356 which may enhance or mask changes caused by a reduction or cessation of intralocus sexual  
357 conflict.

358

## 359 **Methods**

360

361 Individuals for whole-body and tissue-specific samples were collected from the field as last instar  
362 juveniles in spring 2013 and 2014, respectively (collection locations for all samples are given in  
363 Supplemental Table 25). All individuals were raised in common garden conditions (23°C, 12h:12h,  
364 60% humidity, fed with *Ceanothus* cuttings) until eight days following their final moult. Prior to  
365 RNA extraction, individuals were fed with an artificial medium for two days to avoid RNA  
366 contamination with gut content and then frozen at -80°C. For leg samples, three legs were used  
367 from each individual (one foreleg, one midleg, and one hindleg). Reproductive tracts were  
368 dissected to consist of ovaries, oviducts and spermatheca in females and testes and accessory  
369 glands in males. Note the same individuals were used for leg and reproductive tract samples. To  
370 ensure individuals were reproductively active at the time of sampling, all sexual individuals were  
371 allowed to mate, and asexual and sexual females were observed to lay eggs. When analyses  
372 were repeated using virgin sexual females, we obtained qualitatively similar results (see  
373 Supplemental Material and Supplemental Fig. 12). Note only whole-body samples were available  
374 for this comparison.

375

### 376 ***RNA extraction and sequencing***

377

378 We generated three biological replicates per species and tissue type from pooled individuals (1-  
379 9 individuals per replicate, a total of 516 individuals, in 150 replicates in total (including the virgin  
380 sexual females); see Supplemental Table 25). To extract RNA, samples were flash-frozen in liquid  
381 nitrogen followed by addition of Trizol (Life Technologies) before being homogenized using  
382 mechanical beads (Sigmund Lindner). Chloroform and ethanol were then added to the samples  
383 and the aqueous layer transferred to RNeasy MinElute Columns (Qiagen). RNA extraction was  
384 then completed using an RNeasy Mini Kit following the manufacturer's instructions. RNA quantity  
385 and quality was measured using NanoDrop (Thermo Scientific) and Bioanalyzer (Agilent). Strand-  
386 specific library preparation and single-end sequencing (100 bp, HiSeq2000) were performed at  
387 the Lausanne Genomic Technologies Facility.

388

389 The 150 libraries produced a total of just under 5 billion single-end reads. 6 whole-body and 6  
390 tissue-specific libraries produced significantly more reads than the average for the other samples.  
391 To reduce any influence of this on downstream analyses, these libraries were sampled down to

392 approximately the average number of reads for whole-body or tissue-specific libraries respectively  
393 using seqtk (<https://github.com/lh3/seqtk> Version: 1.2-r94).

394

### 395 ***Transcriptome references***

396

397 *De novo* reference transcriptome assemblies for each species were generated previously<sup>18</sup>. Our  
398 expression analyses were conducted using two sets of orthologs. Firstly, we identified orthologs  
399 between sexual and asexual sister species using reciprocal Blast as described in Parker et al.<sup>24</sup>.  
400 Secondly, we used the 3010 one-to-one orthologs present in all 10 *Timema* species as identified  
401 by Bast et al.<sup>18</sup>. The identified ortholog sequences varied in length among different species. Since  
402 length variation might influence estimates of gene expression, we aligned orthologous sequences  
403 using PRANK (v.100802, default options)<sup>25</sup> and trimmed them using alignment\_trimmer.py<sup>26</sup> to  
404 remove overhanging gaps at the ends of the alignments. If an alignment contained a gap of  
405 greater than 3 bases then sequence preceding or following the alignment gap (whichever was  
406 shortest) was discarded. Any orthologous sequences that had a trimmed length of less than 300  
407 bp were also discarded. Finally, before mapping, genes with significant Blast hits to rRNA  
408 sequences were removed from the trimmed transcriptome references.

409

### 410 ***Read trimming and mapping***

411

412 Before mapping, adapter sequences were trimmed from raw reads with CutAdapt<sup>27</sup>. Reads were  
413 then quality trimmed using Trimmomatic v 0.36<sup>28</sup>, clipping leading or trailing bases with a phred  
414 score of <10 from the read, before using a sliding window from the 5' end to clip the read if 4  
415 consecutive bases had an average phred score of <20. Any reads with a sequence length of <80  
416 after trimming were discarded. Reads from each libret were then mapped to the transcriptome  
417 references using Kallisto (v. 0.43.1)<sup>29</sup> with the following options -l 210 -s 25 --bias --rf-stranded  
418 for whole-body samples and -l 370 -s 25 --bias --rf-stranded for tissue-specific samples (the -l  
419 option was different for whole-body and tissue-specific samples as the fragment length for these  
420 libraries was different).

421

### 422 ***Differential expression analysis***

423

424 Expression analyses were performed using the Bioconductor package EdgeR (v. 3.18.1)<sup>30</sup> in R  
425 (v. 3.4.1)<sup>31</sup>. Firstly, to identify sex-biased genes we compared male and female expression

426 separately for each tissue type in each sexual species. Genes with counts per million less than  
427 0.5 in 2 or more libraries per sex were excluded from expression analyses. Normalization factors  
428 for each library were computed using the TMM method. To estimate dispersion we then fit a  
429 generalized linear model (GLM) with a negative binomial distribution with sex as an explanatory  
430 variable and used a GLM likelihood ratio test to determine the significance of sex on gene  
431 expression for each gene. P-values were then corrected for multiple tests using Benjamini and  
432 Hochberg's algorithm<sup>32</sup>. Sex-biased genes were then defined as genes that showed a greater  
433 than 2 fold difference in expression between males and females with an FDR < 0.05. Note all  
434 genes not classified as sex-biased were classified as unbiased genes. We chose this threshold  
435 in order to select a robust set of sex-biased genes, and to reduce the effect of sex-biased  
436 allometry<sup>33</sup>. Note that analyses using just an FDR threshold to define sex-biased genes produced  
437 qualitatively similar results (Supplemental Tables 26-27).

438  
439 Clustering of expression values ( $\log_2$  CPM) was performed using Ward's hierarchical clustering  
440 of Euclidean distances with the R package pvclust (v. 2.0.0)<sup>34</sup>, with bootstrap resampling  
441 (method.hclust="ward.D2", method.dist="euclidean", nboot=10000), and visualized using R  
442 package pheatmap (v. 1.0.8)<sup>35</sup>.

443  
444 To quantify how sex-biased genes change in expression in asexual females we then compared  
445 gene expression in sexual and asexual females separately for each species pair and each tissue  
446 type. We also compared the change in expression in asexual females for male- and female-  
447 biased genes to unbiased genes using a Wilcoxon test, corrected for multiple tests using  
448 Benjamini and Hochberg's algorithm<sup>32</sup>. To determine if changes in sex-biased gene expression in  
449 asexual females are larger for genes sex-biased in fewer species we fit a generalized linear mixed  
450 model with the number of species a gene is sex-biased in as a fixed effect and gene ID as a  
451 random effect in R. A separate model was fit for male- and female- biased genes in each tissue.  
452 P-values were corrected for multiple tests using Benjamini and Hochberg's algorithm.

453

#### 454 ***Analysis of sex-limited genes***

455

456 Sex-limited genes were classified as genes that had at least 2 FKPM (Fragments Per Kilobase  
457 Million) in each replicate of one sex and 0 FKPM in each replicate of the other sex. FKPM values  
458 were calculated using EdgeR. The expression levels of female-limited genes in sexual and

459 asexual females, and male-limited genes in sexual males and asexual females were compared  
460 using a Wilcoxon test, corrected for multiple tests using Benjamini and Hochberg's algorithm<sup>32</sup>.

461

### 462 ***Sequence evolution of sex-biased genes***

463

464 To test if sex-biased genes have a higher rate of divergence in asexuals, we examined if sex-  
465 biased genes have elevated dN/dS ratios in asexuals. To do this we firstly fit a binomial glmm  
466 (dN/dS values were transformed to fall into two categories: zero or non-zero), with reproductive  
467 mode, sex-bias and their interaction as fixed effects and gene identity as a random effect.  
468 Secondly, we firstly fit a glmm with a gamma distribution to the dN/dS values that were greater  
469 than zero, with the same fixed and random effects as the binomial model. All glmms were fit using  
470 the lme4 package (v. 1.1.14)<sup>36</sup> in R, and significance of terms was determined using a log-  
471 likelihood ratio test. dN/dS values were calculated for each of the one-to-one orthologs using  
472 codeml implemented in the PAML package<sup>37</sup> to generate maximum likelihood estimates of dN/dS  
473 for each terminal branch in the phylogeny (using the "free model") as described in Bast et al.<sup>18</sup>

474

### 475 ***GO term analysis***

476

477 Genes were functionally annotated using Blast2GO (version 4.1.9)<sup>38</sup> as described in Parker et  
478 al.<sup>24</sup> Briefly, sequences from each sexual species were compared with BlastX to either NCBI's nr-  
479 arthropod or *Drosophila melanogaster* (drosoph) databases, to produce two sets of functional  
480 annotations, one derived from all arthropods and one specifically from *Drosophila melanogaster*.  
481 The *D. melanogaster* GO term annotation generated around four times more annotations per  
482 sequence than NCBI's nr-arthropod database. We therefore conducted all subsequent analyses  
483 using the GO terms derived from *D. melanogaster*, but note that results using the annotations  
484 from all arthropods were qualitatively the same (see Supplemental Fig. 13).

485

486 To identify overrepresented GO terms we conducted gene set enrichment analyses (GSEA) using  
487 the R package TopGO (v. 2.28.0)<sup>39</sup>, using the elim algorithm to account for the GO topology. GO  
488 terms were considered to be significantly enriched when  $p < 0.05$ . Repeating our GO term  
489 analyses using the more liberal 'weight01' algorithm produced qualitatively the same results  
490 (results not shown).

491



492 Since we defined sex-biased genes with both FDR and FC thresholds, we ranked sex-biased  
493 genes for the GSEA to take both FDR and FC into account. To identify overrepresented GO terms  
494 for female-biased genes, genes were ranked by FDR in four subsets: female-biased with FC > 2,  
495 female-biased with FC < 2, male-biased with FC < 2, and male-biased with FC > 2. Female-biased  
496 gene subsets were ranked so that small FDR values were ranked highly, male-biased gene  
497 subsets were ranked so that small FDR values were ranked low in the list. The four lists were  
498 then joined together in the order given above, and assigned a unique rank. This ranked list  
499 produces a list where strongly female-biased genes are at the top, followed by weakly female-  
500 biased genes, then weakly male-biased genes, and finally strongly male-biased genes at the  
501 bottom. To identify overrepresented GO terms for male-biased genes the ranked list for female-  
502 biased genes was simply inverted. Finally, to examine the GO terms overrepresented in sex-  
503 biased genes which changed expression in asexuals, female- and male-biased genes were  
504 ranked by fold-change between sexual and asexual females.

505

506 To determine if the overlap of sets of sex-biased genes or GO terms was greater than expected  
507 by chance we used the SuperExactTest package (v. 0.99.4; <sup>40</sup>) in R which calculates the  
508 probability of multi-set intersections. P-values were multiple test corrected using Benjamini and  
509 Hochberg's algorithm implemented in R.

510

## 511 **Data**

512 Raw reads have been deposited in SRA under accession codes SRR5748941-SRR5749000,  
513 for whole-body samples and SRR5786827-SRR5786961 for tissue-specific samples. Scripts for  
514 the analyses in this paper are available at  
515 [https://github.com/DarrenJParker/Timema\\_Sex\\_Biased\\_Gene\\_Exp](https://github.com/DarrenJParker/Timema_Sex_Biased_Gene_Exp), and will be archived at  
516 Zenodo after acceptance.

517

## 518 **Acknowledgements**

519 This study was supported by Swiss FNS grants PP00P3\_170627, PP00P3\_139013, and  
520 CRSII3\_160723. We would like to thank Chloe Larose and Bart Zijlstra for their assistance in  
521 the field. We would also like to thank two anonymous reviewers for their suggestions and  
522 comments on an earlier version of the manuscript.

523

524

525 **Author Contributions**

526 T.S. and D.J.P. designed the study. Z.D., K.J., J.B., and T.S. collected samples, performed  
527 dissections and molecular work. D.J.P. analyzed the data with input from J.B., T.S., and M.R.R..  
528 D.J.P. and T.S. wrote the manuscript with input from all authors.

529 **Figures**

530

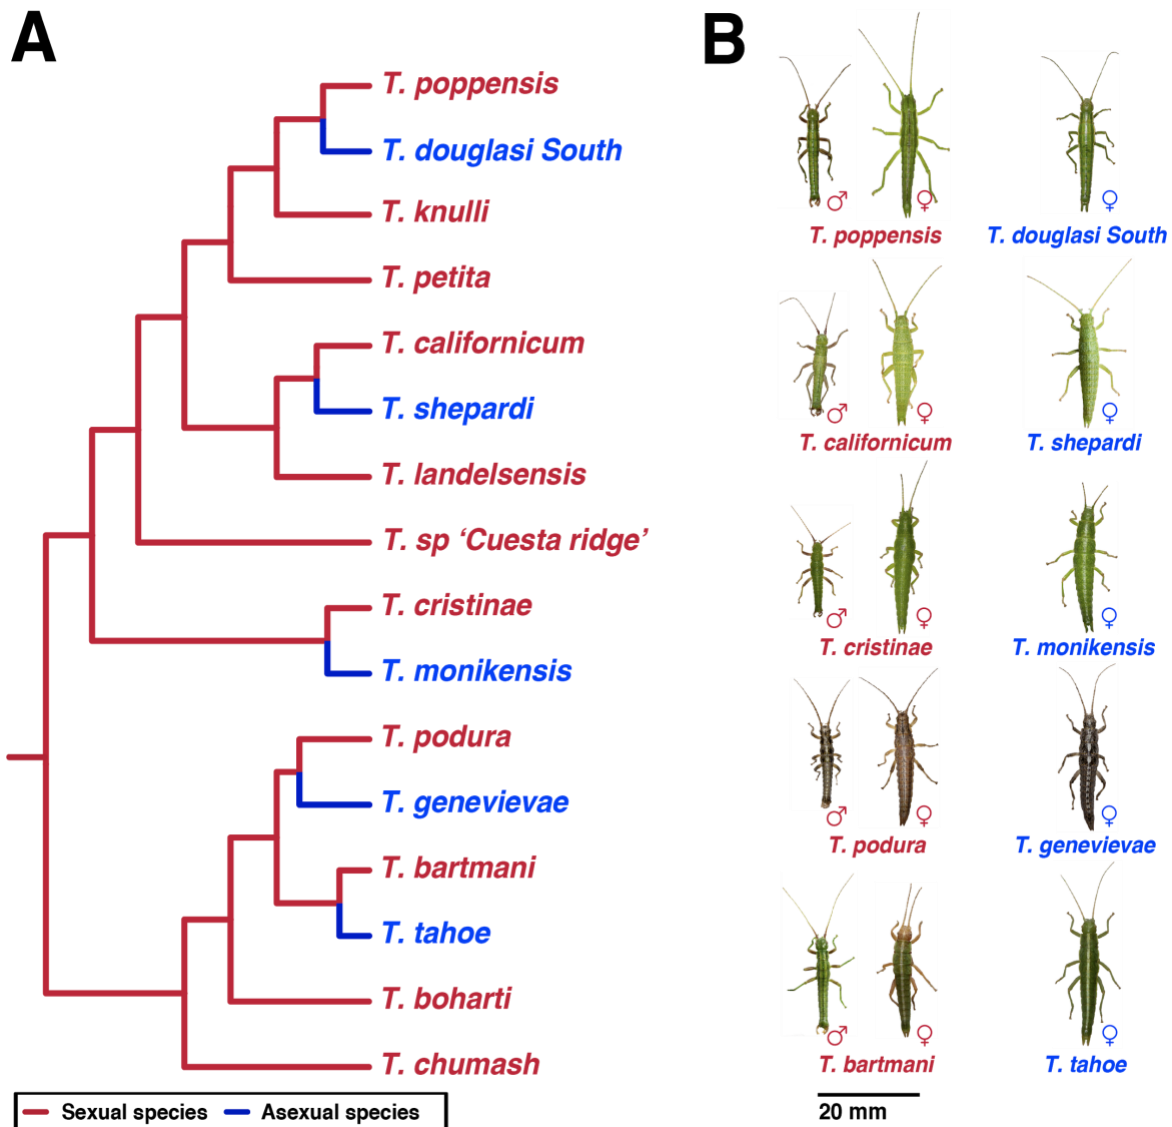

531

532 **Figure 1 | (A)** Phylogeny of described *Timema* species (redrawn from Riesch et al.<sup>41</sup>) with  
533 asexual species added from Schwander et al.<sup>14</sup>). Sexually reproducing species are shown in  
534 red, independently derived asexual lineages in blue. Branches between sexual-aseual sister  
535 species indicate relative divergence time based on Jukes–Cantor corrected divergence from  
536 Bast et al.<sup>18</sup>. Note the oldest asexual lineage, *T. genevievae*, was previously estimated to be 1.5  
537 My old.<sup>14</sup> (B) Photographs of the species used in this study scaled using median body lengths  
538 from their species descriptions.<sup>42–46</sup>

539

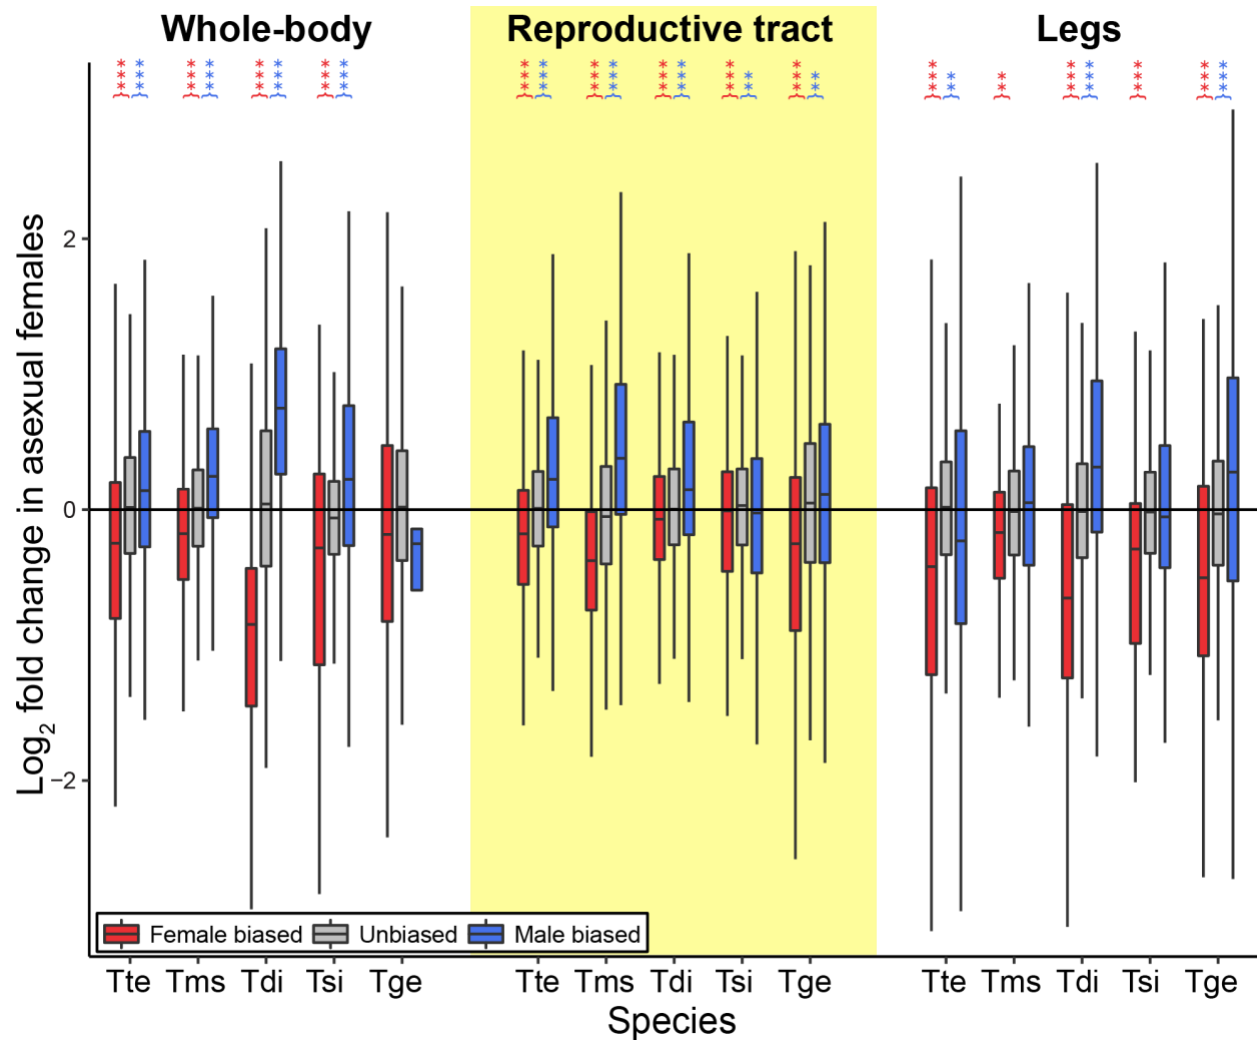

540

541 **Figure 2 | Expression shifts in sex-biased genes in asexual females.** Positive values on the  
542 y-axis indicate increased expression in asexual females. Asterisks indicate the significance level  
543 (FDR) of Wilcoxon tests comparing the change in expression in female-biased (red) and male-  
544 biased (blue) genes to unbiased genes (\*\* $< 0.001$ , \*\*  $< 0.01$ , \*  $< 0.05$ ). Species names are  
545 abbreviated as follows: Tte = *T. tahoe*, Tms = *T. monikensis*, Tdi = *T. douglasi*, Tsi = *T.*  
546 *shepardi*, and Tge = *T. genevieveae*.

547

548

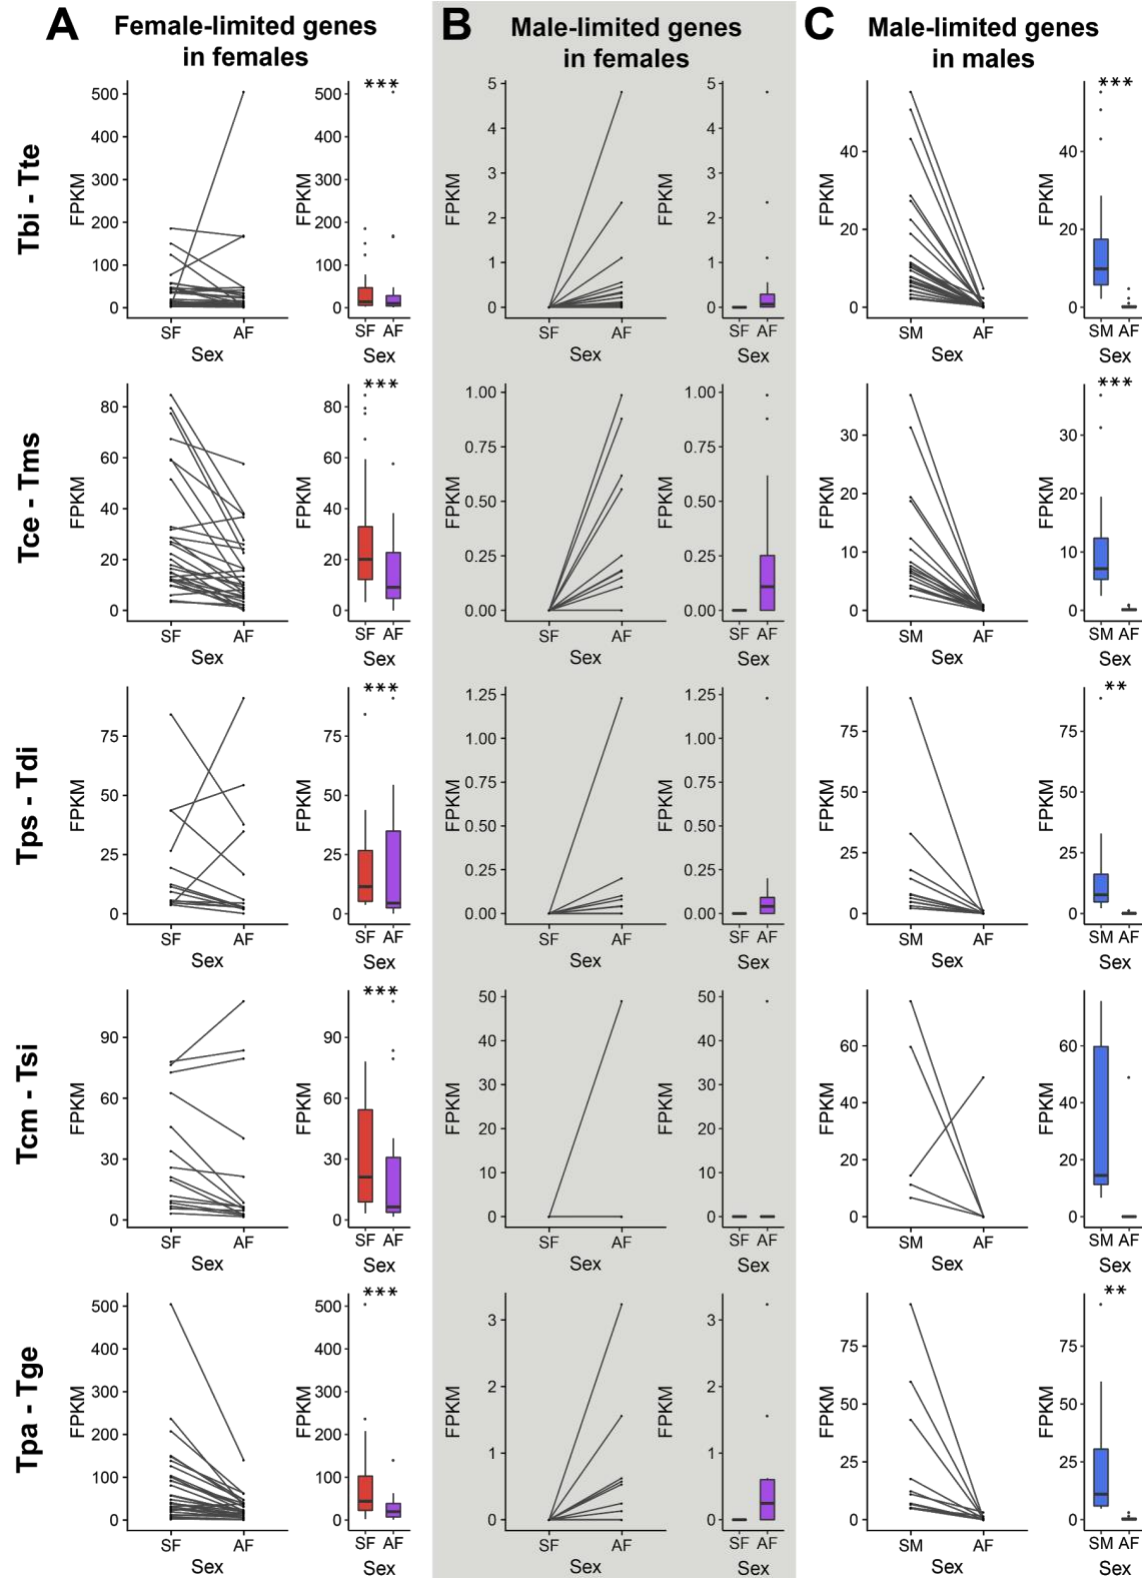

549

550 **Figure 3 | Expression of sex-limited genes in the reproductive tract. A) Expression of**

551 female-limited genes in sexual females (SF, red) and asexual females (AF, purple), B)

552 Expression of male-limited genes in sexual females (SF, red) and asexual females (AF, purple),  
553 C) Expression of male-limited genes in sexual males (SM, blue) and asexual females (AF,  
554 purple). Asterisks indicate the significance level (FDR) of Wilcoxon tests (\*\* $< 0.001$ , \*\* $< 0.01$ ,  
555 \* $< 0.05$ ). Species names are given as abbreviations in the form sexual-species - asexual  
556 species at the left-hand side (Tbi = *T. bartmani*, Tce = *T. cristinae*, Tps = *T. poppensis*, Tcm = *T.*  
557 *californicum*, Tpa = *T. podura*, Tte = *T. tahoe*, Tms = *T. monikensis*, Tdi = *T. douglasi*, Tsi = *T.*  
558 *shepardii*, and Tge = *T. genevieveae*). Note this figure depicts only the results from the  
559 reproductive tract. For whole-bodies see Supplemental Figure 4. Legs were not plotted due to  
560 the small number of sex-limited genes in this tissue type (Supplemental Tables 6-7).

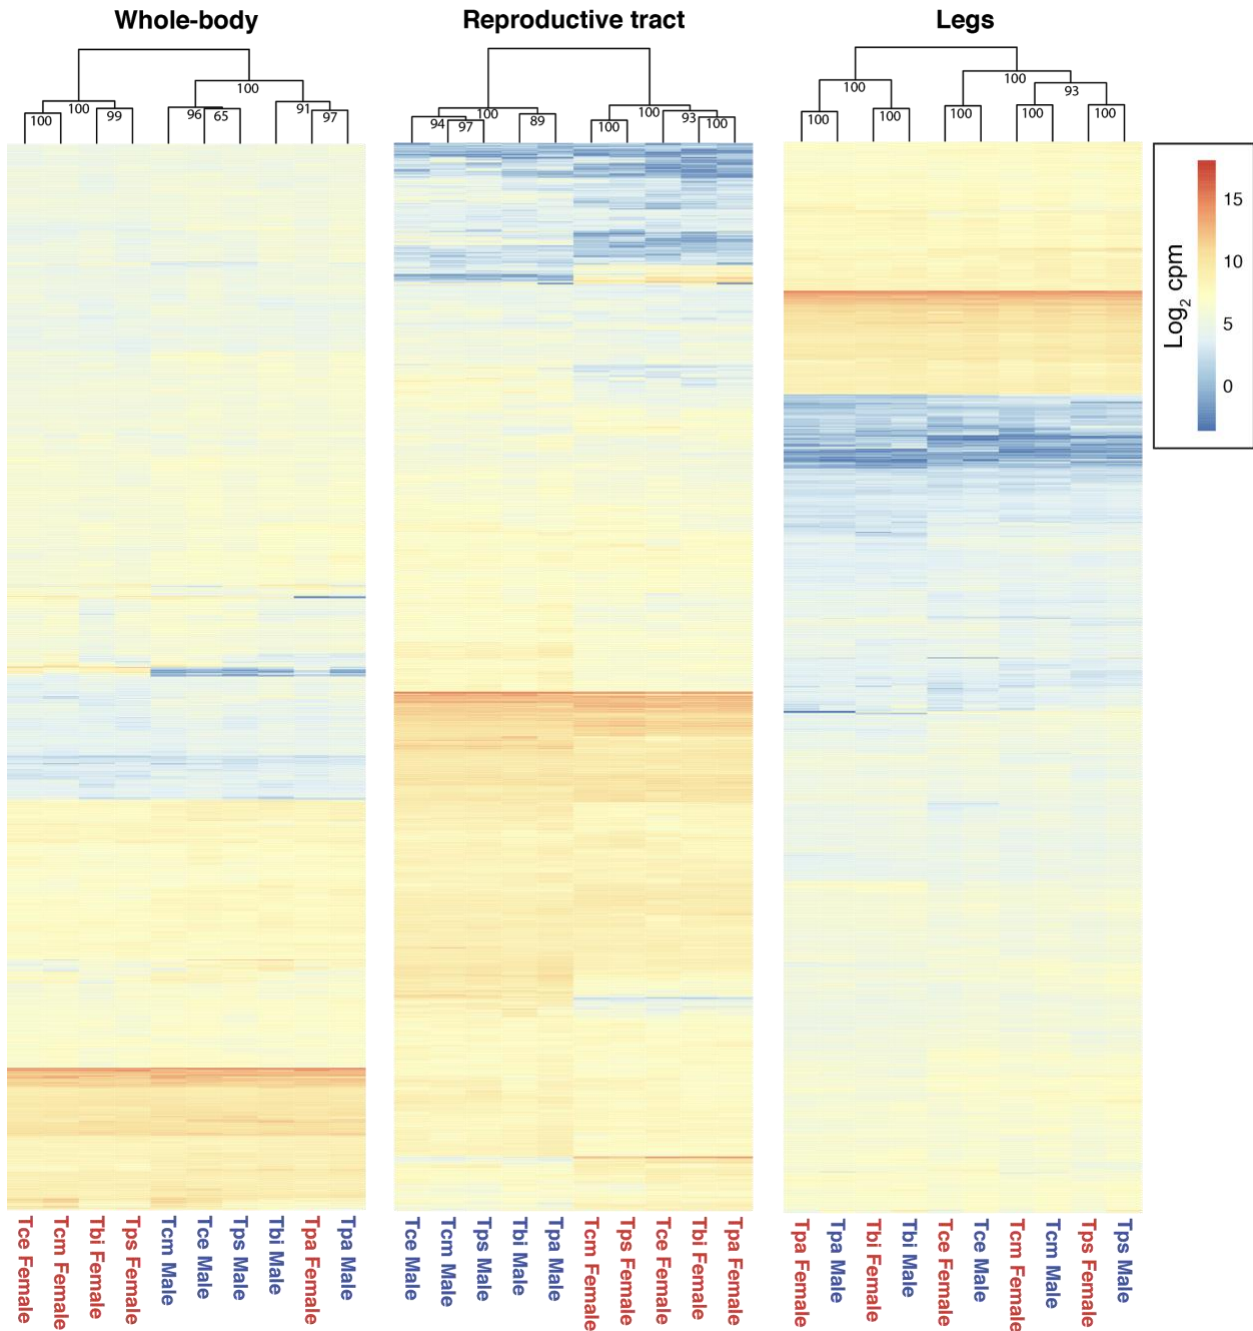

561

562 **Figure 4** | Heatmaps and hierarchical clustering of gene expression (log<sub>2</sub> CPM) for whole-body,

563 reproductive tract, and leg samples. Values on each node show the bootstrap support from

564 10,000 replicates. Species names are abbreviated as follows: Tbi = *T. bartmani*, Tce = *T.*

565 *cristinae*, Tps = *T. poppensis*, Tcm = *T. californicum*, Tpa = *T. podura*

566

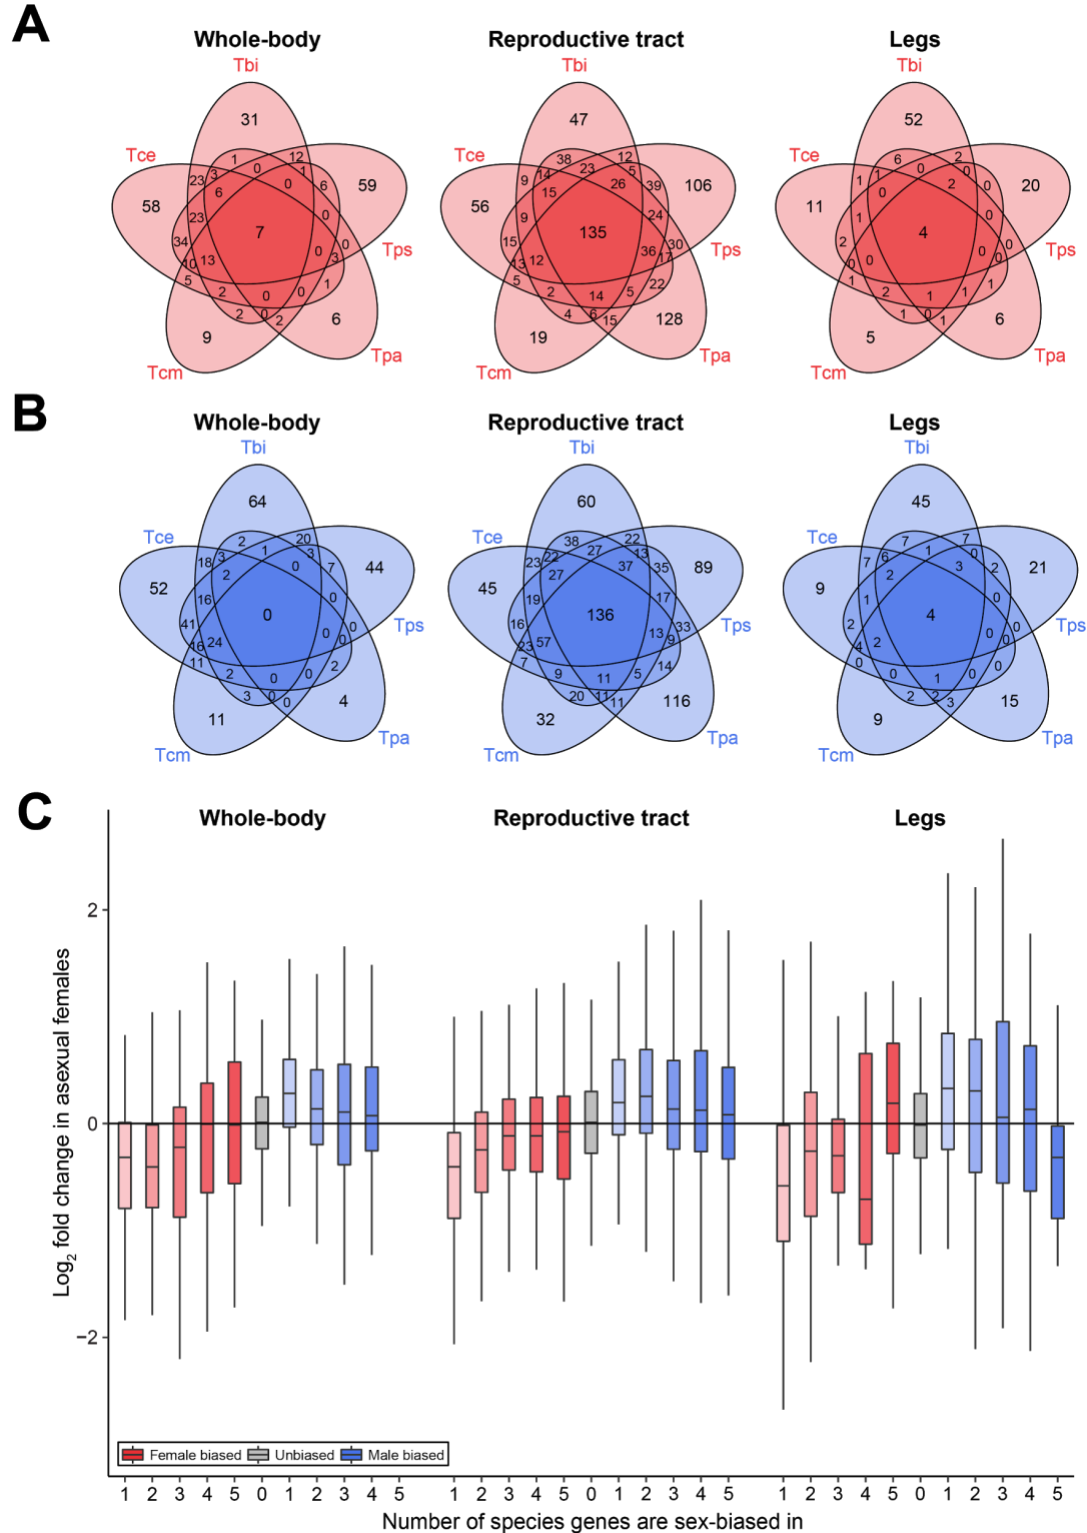

567

568 **Figure 5** | A) Venn-diagrams showing the overlap of female-biased genes B) Venn-diagrams  
 569 showing the overlap of male-biased genes C) Boxplots showing the change in expression of  
 570 female-biased (reds) and male-biased (blues) genes in asexual females when a gene is female



571 or male-biased in 1, 2, 3, 4 or 5 sexual species. Note for genes sex-biased in multiple species  
572 the plot includes fold-change values of that gene in each species it is sex-biased in.

573 **References**

574  
575

- 576 1. Lande, R. Sexual dimorphism, sexual selection, and adaptation in polygenic characters.  
577 *Evolution* **34**, 292–305 (1980).
- 578 2. Rice, W. R. & Chippindale, A. K. Intersexual ontogenetic conflict. *J. Evol. Biol.* **14**, 685–693  
579 (2001).
- 580 3. Mank, J. E. The transcriptional architecture of phenotypic dimorphism. *Nature Ecology &*  
581 *Evolution* **1**, 0006 (2017).
- 582 4. Connallon, T. & Knowles, L. L. Intergenomic conflict revealed by patterns of sex-biased  
583 gene expression. *Trends Genet.* **21**, 495–499 (2005).
- 584 5. Innocenti, P. & Morrow, E. H. The sexually antagonistic genes of *Drosophila melanogaster*.  
585 *PLoS Biol.* **8**, e1000335 (2010).
- 586 6. Griffin, R. M., Dean, R., Grace, J. L., Rydén, P. & Friberg, U. The shared genome is a  
587 pervasive constraint on the evolution of sex-biased gene expression. *Mol. Biol. Evol.* **30**,  
588 2168–2176 (2013).
- 589 7. Cheng, C. & Kirkpatrick, M. Sex-specific selection and sex-biased gene expression in  
590 humans and flies. *PLoS Genet.* **12**, e1006170 (2016).
- 591 8. Hollis, B., Houle, D., Yan, Z., Kawecki, T. J. & Keller, L. Evolution under monogamy  
592 feminizes gene expression in *Drosophila melanogaster*. *Nat. Commun.* **5**, 3482 (2014).
- 593 9. Veltsos, P., Fang, Y., Cossins, A. R., Snook, R. R. & Ritchie, M. G. Mating system  
594 manipulation and the evolution of sex-biased gene expression in *Drosophila*. *Nat. Commun.*  
595 **8**, 2072 (2017).
- 596 10. Moghadam, H. K., Pointer, M. A., Wright, A. E., Berlin, S. & Mank, J. E. W chromosome  
597 expression responds to female-specific selection. *Proc. Natl. Acad. Sci. U. S. A.* **109**, 8207–  
598 8211 (2012).

- 599 11. Immonen, E., Snook, R. R. & Ritchie, M. G. Mating system variation drives rapid evolution  
600 of the female transcriptome in *Drosophila pseudoobscura*. *Ecol. Evol.* **4**, 2186–2201 (2014).
- 601 12. Janicke, T., Häderer, I. K., Lajeunesse, M. J. & Anthes, N. Darwinian sex roles confirmed  
602 across the animal kingdom. *Sci Adv* **2**, e1500983 (2016).
- 603 13. Dean, R., Hammer, C., Higham, V. & Dowling, D. K. Masculinization of gene expression is  
604 associated with male quality in *Drosophila melanogaster*. *Evolution* (2018).  
605 doi:10.1111/evo.13618
- 606 14. Schwander, T., Henry, L. & Crespi, B. J. Molecular evidence for ancient asexuality in  
607 *Timema* stick insects. *Curr. Biol.* **21**, 1129–1134 (2011).
- 608 15. Schwander, T. & Crespi, B. J. Multiple direct transitions from sexual reproduction to  
609 apomictic parthenogenesis in *Timema* stick insects. *Evolution* **63**, 84–103 (2009).
- 610 16. Schwander, T., Crespi, B. J., Gries, R. & Gries, G. Neutral and selection-driven decay of  
611 sexual traits in asexual stick insects. *Proc. Biol. Sci.* **280**, 20130823 (2013).
- 612 17. Ellegren, H. & Parsch, J. The evolution of sex-biased genes and sex-biased gene  
613 expression. *Nat. Rev. Genet.* **8**, 689–698 (2007).
- 614 18. Bast, J. *et al.* Consequences of asexuality in natural populations: insights from stick insects.  
615 *Mol. Biol. Evol.* **35**, 1668–1677 (2018).
- 616 19. Arnqvist, G. & Rowe, L. *Sexual conflict*. (Princeton University Press, 2005).
- 617 20. Gillott, C. Male accessory gland secretions: modulators of female reproductive physiology  
618 and behavior. *Annu. Rev. Entomol.* **48**, 163–184 (2003).
- 619 21. Roy, D., Seehausen, O. & Nosil, P. Sexual dimorphism dominates divergent host plant use  
620 in stick insect trophic morphology. *BMC Evol. Biol.* **13**, 135 (2013).
- 621 22. Hunt, J., Snook, R. R., Mitchell, C., Crudgington, H. S. & Moore, A. J. Sexual selection and  
622 experimental evolution of chemical signals in *Drosophila pseudoobscura*. *J. Evol. Biol.* **25**,  
623 2232–2241 (2012).
- 624 23. Dale, J., Dey, C. J., Delhey, K., Kempnaers, B. & Valcu, M. The effects of life history and

- 625 sexual selection on male and female plumage colouration. *Nature* **527**, 367–370 (2015).
- 626 24. Parker, D. J. *et al.* Repeated evolution of asexuality involves convergent gene expression  
627 changes. *Mol. Biol. Evol.* **36**, 350–364 (2019).
- 628 25. Löytynoja, A. & Goldman, N. An algorithm for progressive multiple alignment of sequences  
629 with insertions. *Proc. Natl. Acad. Sci. U. S. A.* **102**, 10557–10562 (2005).
- 630 26. Parker, D. J. fasta\_tools v1.2. *Zenodo*. <https://zenodo.org/record/59775> (2016).  
631 doi:10.5281/zenodo.162913
- 632 27. Martin, M. Cutadapt removes adapter sequences from high-throughput sequencing reads.  
633 *EMBnet.journal* **17**, 10–12 (2011).
- 634 28. Bolger, A. M., Lohse, M. & Usadel, B. Trimmomatic: a flexible trimmer for Illumina  
635 sequence data. *Bioinformatics* **30**, 2114–2120 (2014).
- 636 29. Bray, N. L., Pimentel, H., Melsted, P. & Pachter, L. Near-optimal probabilistic RNA-seq  
637 quantification. *Nat. Biotechnol.* **34**, 525–527 (2016).
- 638 30. Robinson, M. D., McCarthy, D. J. & Smyth, G. K. edgeR: a Bioconductor package for  
639 differential expression analysis of digital gene expression data. *Bioinformatics* **26**, 139–140  
640 (2010).
- 641 31. R Core Team. R: A Language and Environment for Statistical Computing. (2017).
- 642 32. Benjamini, Y. & Hochberg, Y. Controlling the false discovery rate: A practical and powerful  
643 approach to multiple testing. *J. R. Stat. Soc. Series B Stat. Methodol.* **57**, 289–300 (1995).
- 644 33. Montgomery, S. H. & Mank, J. E. Inferring regulatory change from gene expression: the  
645 confounding effects of tissue scaling. *Mol. Ecol.* **25**, 5114–5128 (2016).
- 646 34. Suzuki, R. & Shimodaira, H. Pvcust: an R package for assessing the uncertainty in  
647 hierarchical clustering. *Bioinformatics* **22**, 1540–1542 (2006).
- 648 35. Kolde, R. Pheatmap: pretty heatmaps. *R package version* **61**, (2012).
- 649 36. Bates, D., Mächler, M., Bolker, B. & Walker, S. Fitting linear mixed-effects models using  
650 lme4. *Journal of Statistical Software, Articles* **67**, 1–48 (2015).

- 651 37. Yang, Z. PAML 4: phylogenetic analysis by maximum likelihood. *Mol. Biol. Evol.* **24**, 1586–  
652 1591 (2007).
- 653 38. Götz, S. *et al.* High-throughput functional annotation and data mining with the Blast2GO  
654 suite. *Nucleic Acids Res.* **36**, 3420–3435 (2008).
- 655 39. Alexa, A., Rahnenführer, J. & Lengauer, T. Improved scoring of functional groups from  
656 gene expression data by decorrelating GO graph structure. *Bioinformatics* **22**, 1600–1607  
657 (2006).
- 658 40. Wang, M., Zhao, Y. & Zhang, B. Efficient test and visualization of multi-set intersections.  
659 *Sci. Rep.* **5**, 16923 (2015).
- 660 41. Riesch, R. *et al.* Transitions between phases of genomic differentiation during stick-insect  
661 speciation. *Nature Ecology & Evolution* **1**, 0082 (2017).
- 662 42. Vickery, V. R. & Sandoval, C. P. Two new species of *Timema* (Phasmatoptera:  
663 Timematodea: Timematidae), one parthenogenetic, in California. *J. Orthoptera Res.* 45–47  
664 (1999).
- 665 43. Vickery, V. R. & Sandoval, C. P. *Timema bartmani* (Phasmatoptera: Timematodea:  
666 Timematidae), a new species from southern California. *Can. Entomol.* **129**, 933–936  
667 (1997).
- 668 44. Sandoval, C. P. & Vickery, V. R. *Timema douglasi* (Phasmatoptera: Timematodea), a new  
669 parthenogenetic species from southwestern Oregon and northern California, with notes on  
670 other species. *Can. Entomol.* **128**, 79–84 (1996).
- 671 45. Vickery, V. R. Revision of *Timema scudder* (Phasmatoptera: Timematodea) including three  
672 new species. *Can. Entomol.* **125**, 657–692 (1993).
- 673 46. Vickery, V. R. & Sandoval, C. P. *Timema monikensis*, species nov. (Phasmatoptera:  
674 Timematodea: Timematidae), a new parthenogenetic species in California. (1998).
